# Supplementary material
Source: publisher figshare collection journal article supplement (https://acs.figshare.com/ndownloader/files/12798797)
Supplement: Supplementary file 1 [file 12798797]

## Supporting Information

### **The pH Controlled Excellent Photocatalytic Activity of a Composite Designed from CuBi-based Metal Organic Oxide and Graphene**

Fa-Nian Shi,<sup>\*,†</sup> Miao Lu,<sup>†</sup> Yi-Wen Bai,<sup>†</sup> Fang Liang,<sup>†</sup> Xiao-Yi Song,<sup>†</sup> Ge Xu,<sup>\*,†</sup> Xiao-Qiang Fan,<sup>‡</sup>

Xue-Hua Yu,<sup>‡</sup> Hong-Peng You,<sup>\*,§</sup> and Zhen Zhao<sup>\*,‡</sup>

<sup>†</sup>School of Science, Shenyang University of Technology, No. 111, Shenliao West Road, Economic  
& Technological Development Zone, 110870, Shenyang, P. R. China

<sup>‡</sup>Institute of Catalysis for Energy and Environment, Shenyang Normal University, 110034,  
Shenyang, P. R. China

<sup>§</sup>State Key Laboratory of Rare Earth Resource Utilization, Changchun Institute of Applied  
Chemistry, Chinese Academy of Sciences, Changchun 130022, P. R. China.

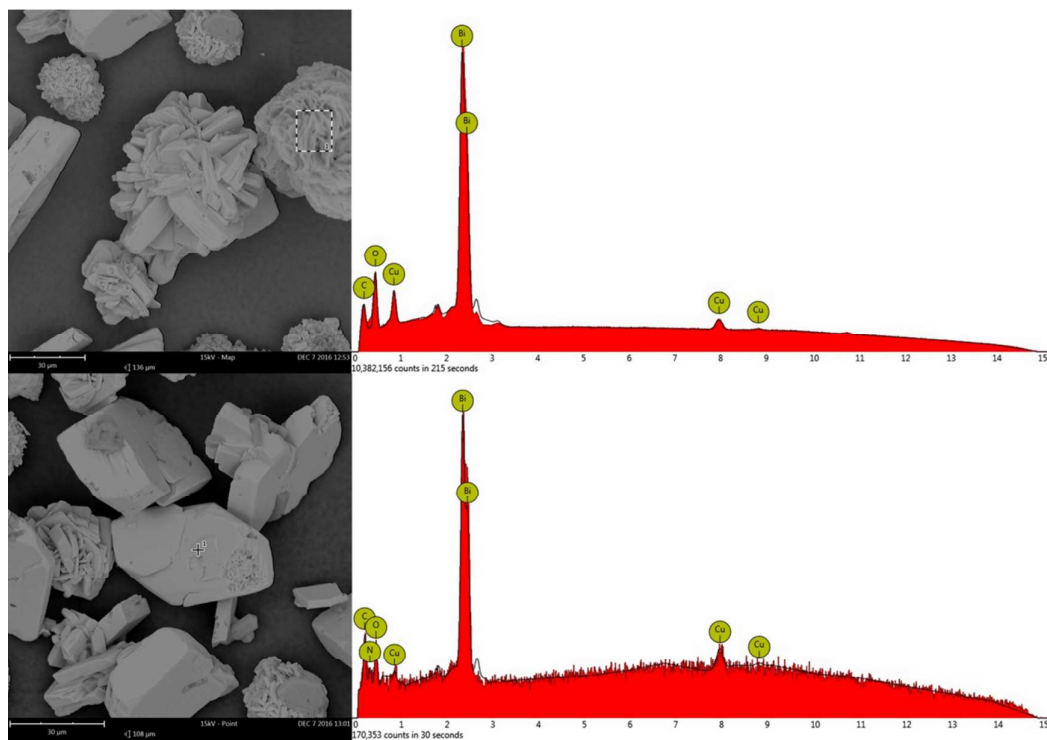

**Fig. S1** The EDS spectra of CuBi-MOO/Gr composite on different particles

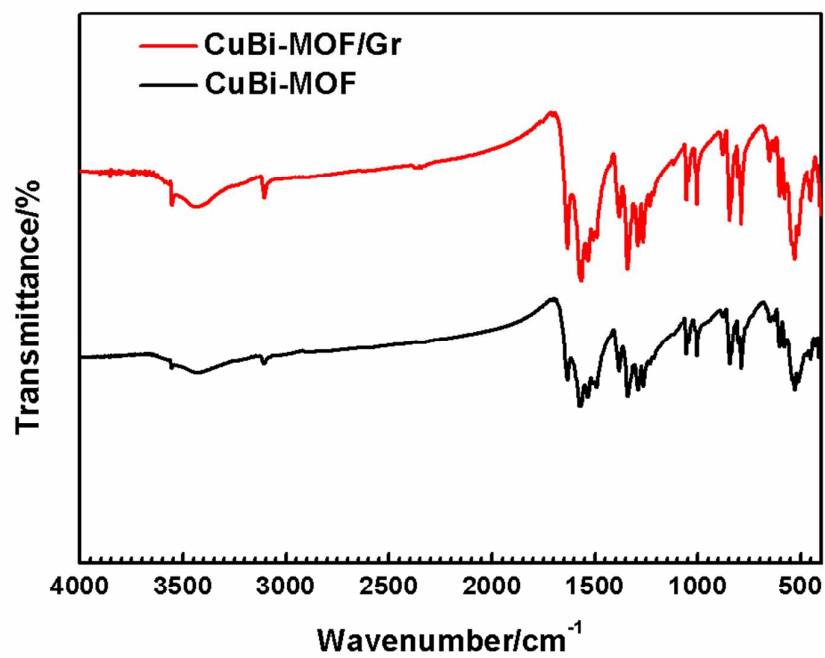

**Fig. S2** FT-IR spectra of CuBi-MOO and CuBi-MOO/Gr
